# Supplementary material
Source: PubMed Central journal article supplement (PMC7960361)
Supplement: 16-00535.pdf [file 16-00535.pdf]

**On-line Table: Lesion characteristics for each subject**

| ID | Pathology                                                     | WHO | Location           | Distance to TM Activation (tb-fMRI) (mm) | Mass Effect | Sex | Age (yr) | Size (mL) |
|----|---------------------------------------------------------------|-----|--------------------|------------------------------------------|-------------|-----|----------|-----------|
| 1  | Infiltrating astrocytoma with early anaplastic transformation | III | L MT               | 43.2                                     | No          | M   | 33       | 56.73     |
| 2  | Oligodendroglioma                                             | II  | R PreCG/SFG        | 12.6                                     | No          | F   | 37       | 34.85     |
| 3  | Infiltrating astrocytoma with early anaplastic transformation | III | L PreCG/SFG/CC/INS | 0                                        | No          | M   | 35       | 87.56     |
| 4  | Anaplastic astrocytoma                                        | III | L STG              | N/A                                      | No          | M   | 69       | 7.35      |
| 5  | Glioblastoma with oligodendroglial component                  | IV  | L PreCG            | 1.4                                      | Yes         | F   | 44       | 14.73     |
| 6  | Myeloid sarcoma                                               |     | L IFG              | 23.3                                     | No          | M   | 53       | 0.84      |
| 7  | No pathology; imaging suggestive of low-grade glioma          |     | L OFG/TP/INS       | 17.1                                     | No          | M   | 43       | 56.56     |
| 8  | Oligodendroglioma                                             | II  | L MFG              | 6.9                                      | No          | M   | 50       | 25.84     |
| 9  | Anaplastic astrocytoma                                        | III | R PreCG/CST        | 0                                        | Yes         | F   | 63       | 15.67     |
| 10 | Glioblastoma                                                  | IV  | L STG/INS          | 19.8                                     | No          | F   | 33       | 14.32     |
| 11 | Oligoastrocytoma                                              | II  | L PreCG/PostCG     | 7                                        | Yes         | F   | 36       | 37.50     |
| 12 | Anaplastic astrocytoma                                        | III | L SFG/MFG          | 13.1                                     | No          | F   | 34       | 52.07     |
| 13 | Oligodendroglioma                                             | II  | L PreCG/MFG        | 0                                        | Yes         | M   | 24       | 53.17     |
| 14 | No pathology; imaging suggestive of low-grade glioma          |     | L INS              | 17.2                                     | No          | M   | 65       | 1.79      |
| 15 | Oligoastrocytoma                                              | II  | L PreCG/PostCG/SMG | 1.8                                      | No          | M   | 36       | 14.16     |
| 16 | Oligodendroglioma                                             | II  | L TP/MT/INS        | N/A                                      | No          | M   | 36       | 30.48     |
| 17 | No pathology; imaging suggestive of low-grade glioma          |     | L SFG/ACG          | 38.2                                     | No          | M   | 65       | 20.14     |
| 18 | Diffuse astrocytoma                                           | II  | L STG/MTG/INS      | 1.09                                     | Yes         | M   | 35       | 118.57    |
| 19 | Oligodendroglioma                                             | II  | R INS              | 15.3                                     | Yes         | F   | 45       | 53.30     |
| 20 | Glioblastoma                                                  | IV  | R TP/INS           | N/A                                      | No          | F   | 59       | 14.73     |
| 21 | Diffuse astrocytoma                                           | II  | L MTG/ITG          | N/A                                      | Yes         | F   | 26       | 61.36     |
| 22 | Oligoastrocytoma                                              | II  | L OFG/INS          | 43.9                                     | No          | M   | 25       | 74.30     |
| 23 | Anaplastic oligoastrocytoma                                   | III | L PreCG/PostCG     | 0                                        | No          | M   | 30       | 26.90     |
| 24 | Oligoastrocytoma                                              | II  | L PreCG            | 0                                        | No          | M   | 34       | 35.77     |
| 25 | Oligodendroglioma                                             | II  | L MFG              | 0                                        | No          | F   | 21       | 19.47     |
| 26 | Oligoastrocytoma                                              | II  | L SFG/MFG/IFG      | 19.6                                     | No          | F   | 32       | 159.05    |

**Note:**—PreCG indicates precentral gyrus; PostCG, postcentral gyrus; SFG, superior frontal gyrus; MFG, middle frontal gyrus; OFG, orbitofrontal gyrus; STG, superior temporal gyrus; MTG, middle temporal gyrus; ITG, inferior temporal gyrus; MT, mesial temporal lobe; TP, temporal pole; INS, insula; SMG, supramarginal gyrus; ACG, anterior cingulate gyrus; CC, corpus callosum; CST, corticospinal tract; ID, identification; WHO, World Health Organization; L, left; R, right.
